# Supplementary figures and images for: Influence of Time Gap on the Buildability of Cement Mixtures Designed for 3D Printing
Source: MDPI journal article supplement (doi:10.3390/buildings14041070), 2024-04-12

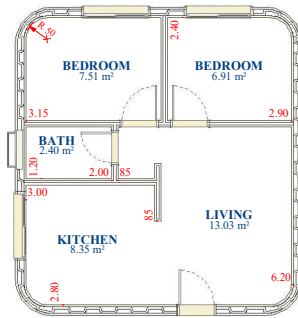

AFFORDABLE HOUSE

AREA: 39,22 m²

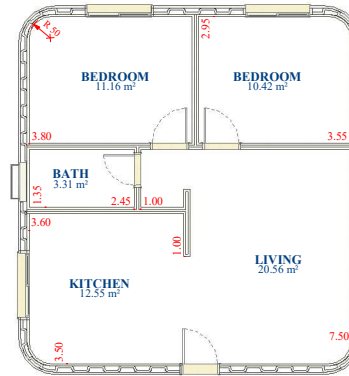

SMALL HOUSE

AREA: 58,00 m²

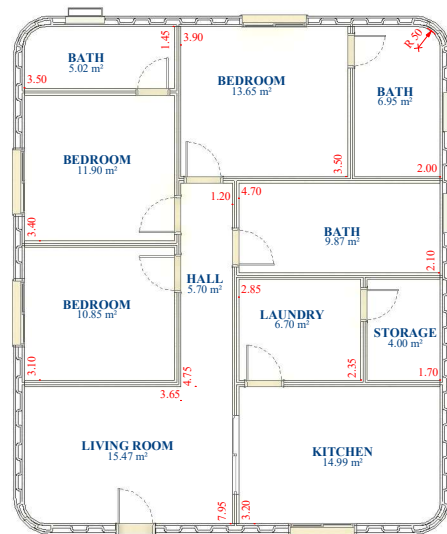

MEDIUM HOUSE

AREA: 105,10 m²

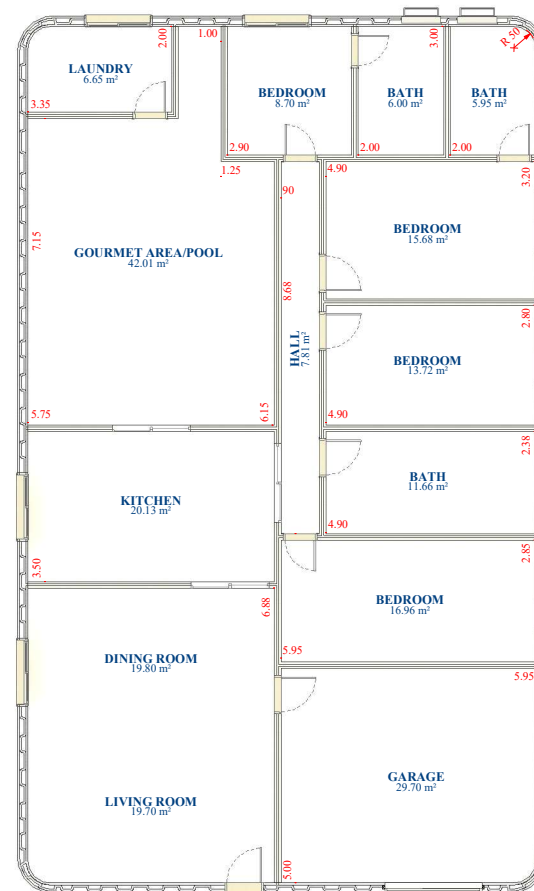

LARGE HOUSE

AREA: 224,47 m²

Supplement: s1 [file s1]
